# Supplementary material for: Graphitic carbon nitride nanosheets with low ON1-doping content as efficient photocatalysts for organic pollutant degradation
Source: Royal Society of Chemistry journal article supplement (doi:10.1039/d0en01198c), 2021-01-01
Supplement: d0en01198c1.pdf [file d0en01198c1.pdf]

## Supporting Information for:

# Graphitic carbon nitride nanosheets with low O<sub>NI</sub>-doping content as an efficient photocatalyst for organic pollutants degradation

Yan Huang,<sup>a</sup> Lichao Ning,<sup>a</sup> Zibo Feng,<sup>a</sup> Guifeng Ma,<sup>a</sup> Shuliang Yang,<sup>b</sup> Yuzhong Su,<sup>a</sup> Yanzhen Hong,<sup>a</sup> Hongtao Wang,<sup>a</sup> Li Peng,<sup>\*a</sup> Jun Li<sup>\*acd</sup>

---

<sup>a</sup> College of Chemistry and Chemical Engineering, Xiamen University, Xiamen 361005, China;

<sup>b</sup> College of Energy, Xiamen University, Xiamen 361102, China

<sup>c</sup> National Engineering Laboratory for Green Chemical Productions of Alcohols, Ethers and Esters, Xiamen University, Xiamen 361005, China

<sup>d</sup> Collaborative Innovation Center of Chemistry for Energy Materials, Xiamen University, Xiamen 361005, China

\* Corresponding authors. Tel.: +86 592 2183055; fax: +86 592 2183055.

E-mail address: li.peng@xmu.edu.cn; junnyxm@xmu.edu.cn.

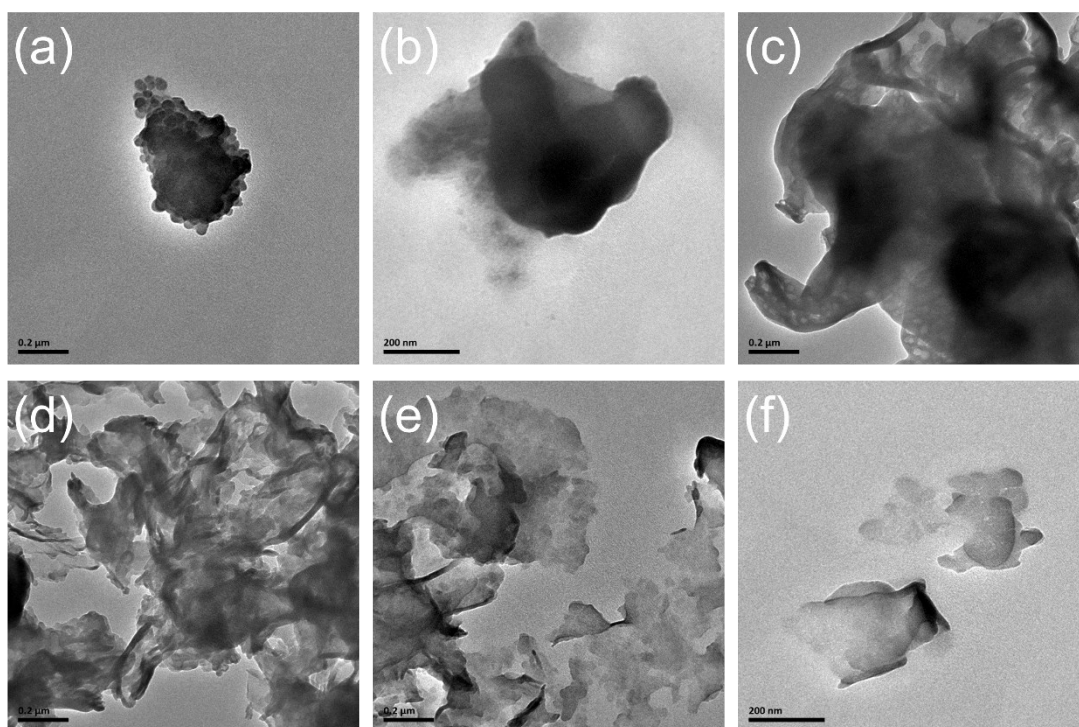

**Fig. S1** TEM images of Um-400 (a), Um-450 (b), Um-500 (c), Um-550 (d), Um-600 (e), Um-650 (f).

**Table S1** Characterization of the Um-x samples.

| Catalysts | Element content (wt%) |       |      | C/N<br>atomic ratio | <i>S</i><br>(m <sup>2</sup> g <sup>-1</sup> ) | <i>A</i><br>(nm) | <i>E</i> <sub>CB</sub> / <i>E</i> <sub>VB</sub><br>(eV) | <i>E</i> <sub>g</sub><br>(eV) |
|-----------|-----------------------|-------|------|---------------------|-----------------------------------------------|------------------|---------------------------------------------------------|-------------------------------|
|           | C                     | N     | O    |                     |                                               |                  |                                                         |                               |
| Um-400    | 32.58                 | 52.57 | 12.6 | 0.723               | 17                                            | 439              | -1.15/1.67                                              | 2.82                          |
| Um-450    | 35.36                 | 56.96 | 6.25 | 0.724               | 30                                            | 464              | -1.11/1.56                                              | 2.67                          |
| Um-500    | 35.92                 | 57.20 | 4.81 | 0.733               | 46                                            | 475              | -1.11/1.50                                              | 2.61                          |
| Um-550    | 37.34                 | 59.04 | 2.16 | 0.738               | 72                                            | 484              | -1.16/1.40                                              | 2.56                          |
| Um-600    | 37.08                 | 58.62 | 2.44 | 0.738               | 82                                            | 452              | -1.17/1.57                                              | 2.74                          |
| Um-650    | 37.43                 | 58.84 | 2.01 | 0.742               | 88                                            | 441              | -1.19/1.62                                              | 2.81                          |

Note: *S*, BET surface area; *A*, absorption edge; *E*<sub>g</sub>, the band gap energy; *E*<sub>CB</sub>, *E*<sub>VB</sub>, the valence band and conduction band potentials, respectively.

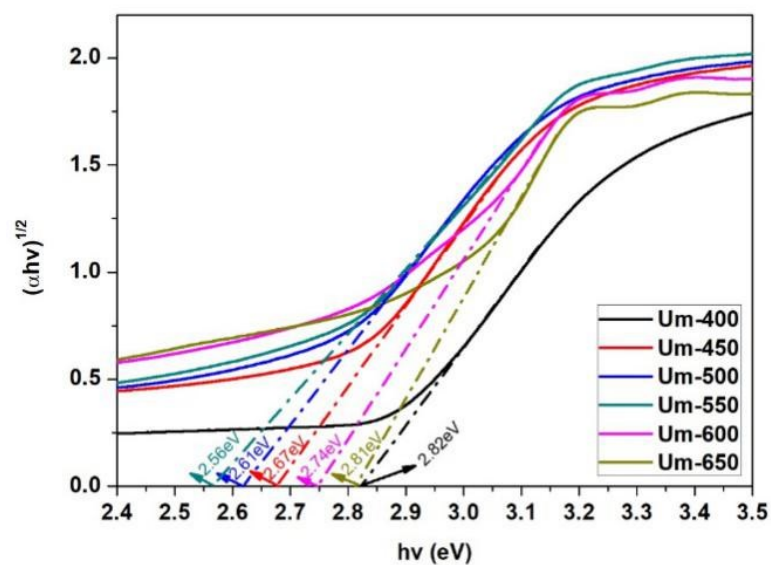

**Fig. S2** The energy band gap of Um-x samples (extrapolated by the Tauc plot).

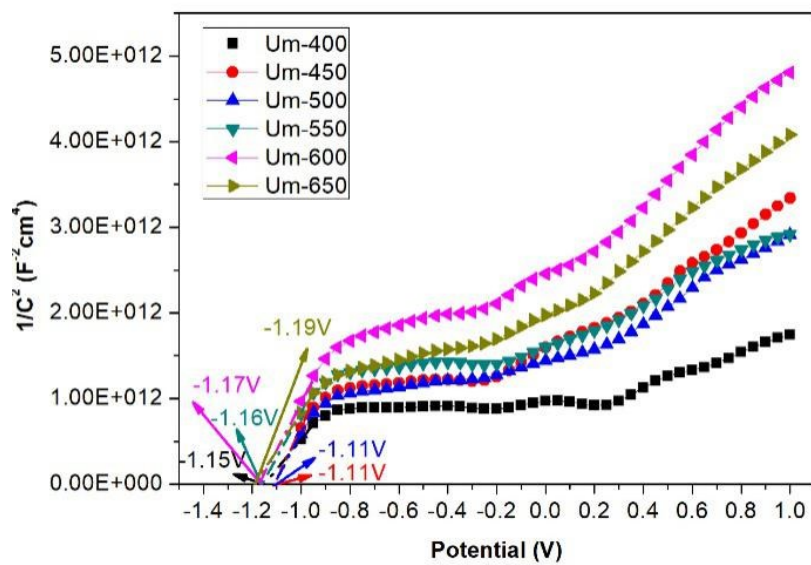

**Fig. S3** The CB value of Um-x samples.

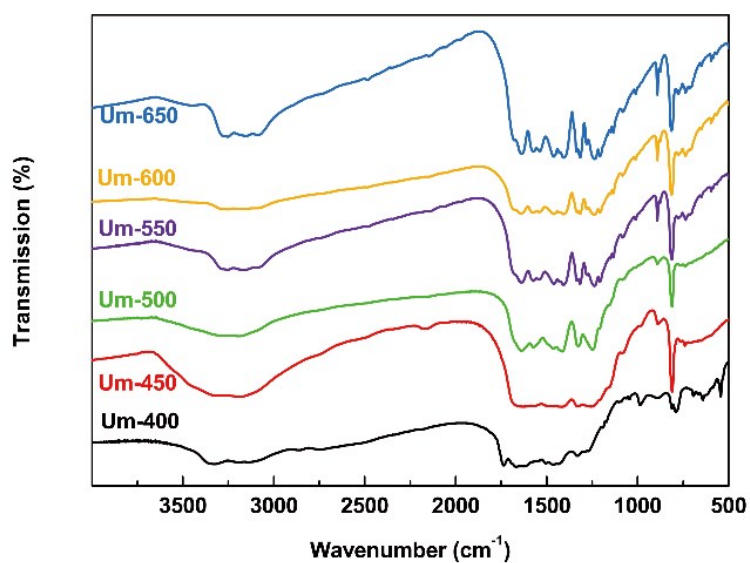

**Fig. S4** FT-IR spectra of Um-x samples.

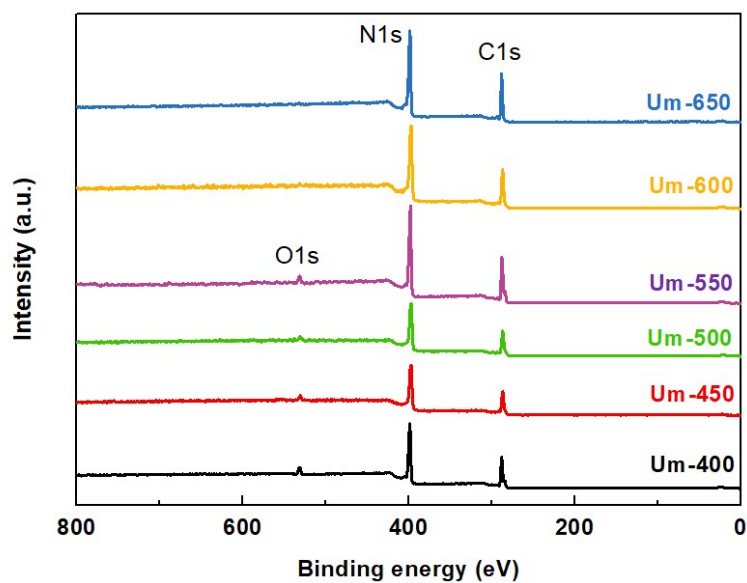

**Fig. S5** XPS survey patterns of Um-x samples.

**Table S2** Element contents of HT-x samples

| g-C <sub>3</sub> N <sub>4</sub> | Element content (wt%) |       |       | C/N<br>atomic ratio |
|---------------------------------|-----------------------|-------|-------|---------------------|
|                                 | C                     | N     | O     |                     |
| HT-0                            | 28.42                 | 49.65 | 18.34 | 0.668               |
| HT-20                           | 31.60                 | 56.35 | 9.23  | 0.654               |
| HT-40                           | 31.97                 | 57.73 | 7.87  | 0.646               |
| HT-60                           | 35.00                 | 61.30 | 1.98  | 0.666               |

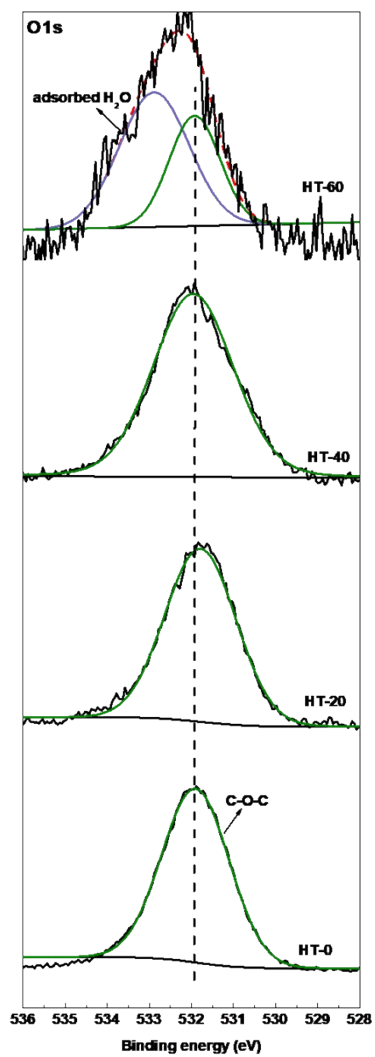

**Fig. S6** The high resolution O 1s XPS spectra of HT-x samples.

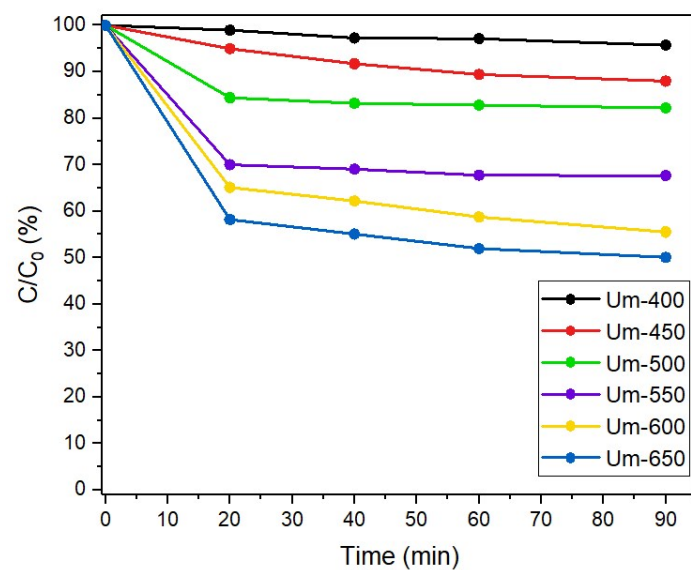

**Fig. S7** RhB adsorption equilibrium in dark condition of Um-x.

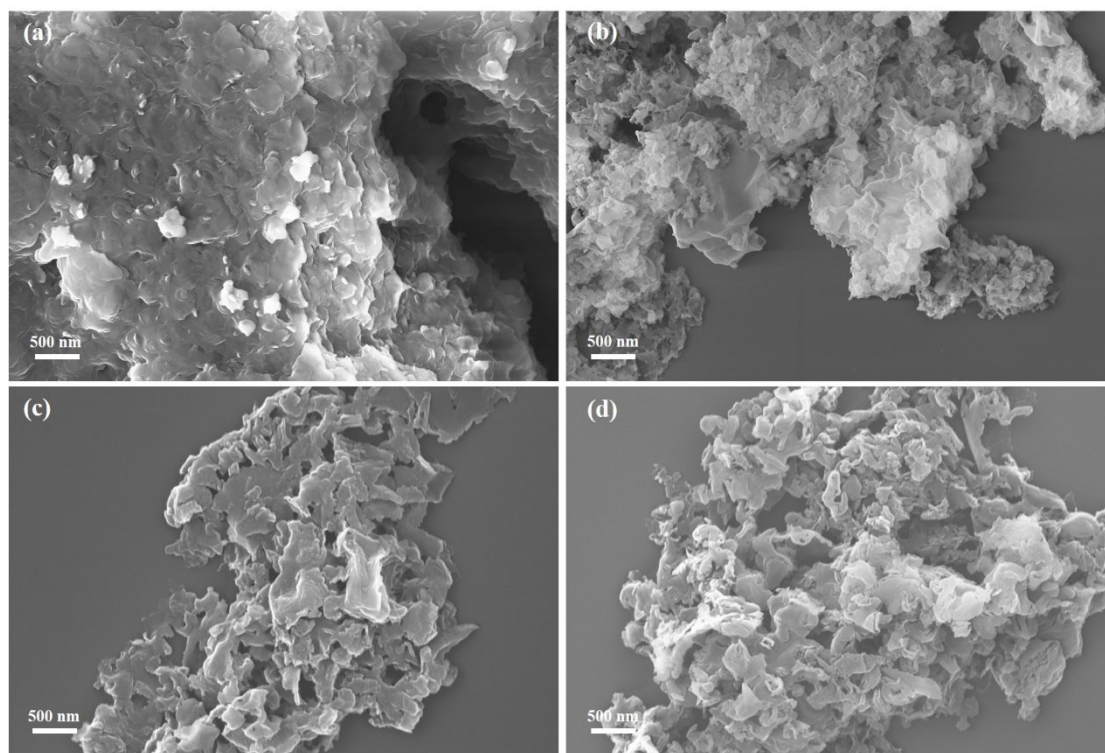

**Fig. S8** SEM images of HT-x: (a) HT-0; (b) HT-20; (c) HT-40; (d) HT-60.

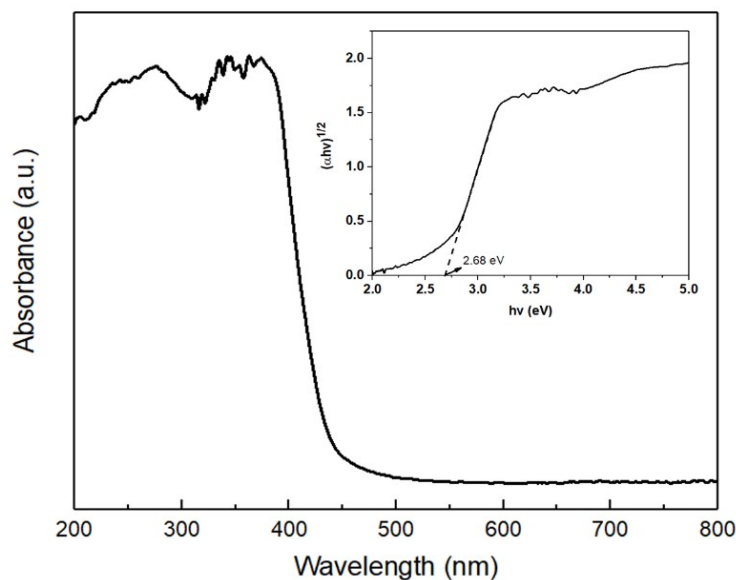

**Fig. S9** UV-Vis DRS spectrum and energy band gap of HT-60.

**Table S3** Comparison of RhB photodegradation of g-C<sub>3</sub>N<sub>4</sub>-based photocatalysts

| Photocatalysts                                                         | RhB photodegradation (time / efficiency) | Ref. (year)          |
|------------------------------------------------------------------------|------------------------------------------|----------------------|
| H-ZSM-5/ g-C <sub>3</sub> N <sub>4</sub>                               | 30min / 99%                              | <sup>1</sup> (2019)  |
| g-C <sub>3</sub> N <sub>4</sub> /CNTs/Ag <sub>3</sub> PO <sub>4</sub>  | 10min / 100%                             | <sup>2</sup> (2019)  |
| APO/CN-5 THF                                                           | 7.5min / 100%                            | <sup>3</sup> (2019)  |
| BCN-3                                                                  | 30min / 100%                             | <sup>4</sup> (2019)  |
| Co-doped g-C <sub>3</sub> N <sub>4</sub>                               | 25min / 99%                              | <sup>5</sup> (2019)  |
| Ph20-g-C <sub>3</sub> N <sub>4</sub>                                   | 25min / 100%                             | <sup>6</sup> (2019)  |
| SM-CN                                                                  | 20min / 95%                              | <sup>7</sup> (2019)  |
| TiO <sub>2</sub> NR/CN NS                                              | 12min / 99%                              | <sup>8</sup> (2018)  |
| g-C <sub>3</sub> N <sub>4</sub> /Bi <sub>5</sub> O <sub>7</sub> I-10   | 20min / 98.2%                            | <sup>9</sup> (2018)  |
| rGO/ g-C <sub>3</sub> N <sub>4</sub>                                   | 30min / 97.2%                            | <sup>10</sup> (2018) |
| MT- g-C <sub>3</sub> N <sub>4</sub>                                    | 30min / 99%                              | <sup>11</sup> (2018) |
| Pt@TiO <sub>2</sub> / g-C <sub>3</sub> N <sub>4</sub>                  | 8min / 93%                               | <sup>12</sup> (2018) |
| OA/N-GQD@ g-C <sub>3</sub> N <sub>4</sub>                              | 10min / 99%                              | <sup>13</sup> (2020) |
| U-300                                                                  | 30min / 90%                              | <sup>14</sup> (2018) |
| g-C <sub>3</sub> N <sub>4</sub> (w-N2)                                 | 12min / 100%                             | <sup>15</sup> (2018) |
| ECD-CN                                                                 | 10min / 99%                              | <sup>16</sup> (2017) |
| g-C <sub>3</sub> N <sub>4</sub> nanosheets                             | 9min / 99.4%                             | <sup>17</sup> (2016) |
| O-C <sub>3</sub> N <sub>4</sub> /Ag@AgCl                               | 15min / 100%                             | <sup>18</sup> (2016) |
| ZnIn <sub>2</sub> S <sub>4</sub> / g-C <sub>3</sub> N <sub>4</sub> -20 | 20min / 100%                             | <sup>19</sup> (2015) |
| Ag/ g-C <sub>3</sub> N <sub>4</sub>                                    | 30min / 90%                              | <sup>20</sup> (2015) |
| g-CNS/Au/CdS                                                           | 5min / 99%                               | <sup>21</sup> (2015) |
| P-doped g-C <sub>3</sub> N <sub>4</sub>                                | 10min / 100%                             | <sup>22</sup> (2015) |
| SnS <sub>2</sub> / g-C <sub>3</sub> N <sub>4</sub>                     | 20min / 99.8%                            | <sup>23</sup> (2015) |
| Ag@AgCl-9/CN                                                           | 30min / 100%                             | <sup>24</sup> (2014) |

|                                                                  |              |                      |
|------------------------------------------------------------------|--------------|----------------------|
| Co <sub>3</sub> O <sub>4</sub> /PCNs                             | 30min / 100% | <sup>25</sup> (2014) |
| O-C <sub>3</sub> N <sub>4</sub> @TiO <sub>2</sub>                | 20min / 100% | <sup>26</sup> (2014) |
| WO <sub>3</sub> -g-C <sub>3</sub> N <sub>4</sub>                 | 30min / 90%  | <sup>27</sup> (2014) |
| Ag@AgCl/ g-C <sub>3</sub> N <sub>4</sub>                         | 20min / 100% | <sup>28</sup> (2014) |
| In <sub>2</sub> S <sub>3</sub> / g-C <sub>3</sub> N <sub>4</sub> | 30min / 96%  | <sup>29</sup> (2014) |
| Ag@AgBr/ g-C <sub>3</sub> N <sub>4</sub>                         | 10min / 95%  | <sup>30</sup> (2014) |
| g-C <sub>3</sub> N <sub>4</sub> /Ag <sub>3</sub> PO <sub>4</sub> | 10min / 96%  | <sup>31</sup> (2014) |
| p-g-C <sub>3</sub> N <sub>4</sub>                                | 30min / 99%  | <sup>32</sup> (2012) |

## References

- 1 K. Prakash, S. Karuthapandian and S. Senthilkumar, *Mater. Chem. Phys.*, 2019, **221**, 34-46.
- 2 W. Wang, L. Wang, W. Li, C. Feng, R. Qiu, L. Xu, X. Cheng and G. Shao, *Mater. Lett.*, 2019, **234**, 183-186.
- 3 V. G. Deonikar, K. Koteswara Reddy, W.-J. Chung and H. Kim, *J. Photochem. Photobiol. A*, 2019, **368**, 168-181.
- 4 F. Hou, Y. Li, Y. Gao, S. Hu, B. Wu, H. Bao, H. Wang and B. Jiang, *Mater. Res. Bull.*, 2019, **110**, 18-23.
- 5 L. Wang, X. Guo, Y. Chen, S. Ai and H. Ding, *Appl. Surf. Sci.*, 2019, **467-468**, 954-962.
- 6 D. Vidyasagar, N. Manwar, A. Gupta, S. G. Ghugal, S. S. Umare and R. Boukherroub, *Catal. Sci. Technol.*, 2019, **9**, 822-832.
- 7 L. Shi, F. Wang and J. Sun, *Mater. Res. Bull.*, 2019, **113**, 115-121.
- 8 S. Luan, D. Qu, L. An, W. Jiang, X. Gao, S. Hua, X. Miao, Y. Wen and Z. Sun, *Sci. Bull.*, 2018, **63**, 683-690.
- 9 X. Geng, S. Chen, X. Lv, W. Jiang and T. Wang, *Appl. Surf. Sci.*, 2018, **462**, 18-28.
- 10 Y. Gu, Y. Yu, J. Zou, T. Shen, Q. Xu, X. Yue, J. Meng and J. Wang, *Mater. Lett.*, 2018, **232**, 107-109.
- 11 N. An, Y. Zhao, Z. Mao, D. K. Agrawal and D. Wang, *Mater. Res. Express*, 2018, **5**, 035502.
- 12 Y. Zou, B. Yang, Y. Liu, Y. Ren, J. Ma, X. Zhou, X. Cheng and Y. Deng, *Adv. Funct. Mater.*, 2018, **28**, 1806214.
- 13 Y. Sun, C. Wang, G. Gu, Y. Ma, Z. Xiong and Y. Liu, *Catal. Today*, 2018, DOI: <https://doi.org/10.1016/j.cattod.2018.09.031>.
- 14 X. Song, Q. Yang, M. Yin, D. Tang and L. Zhou, *RSC Adv.*, 2018, **8**, 7260-7268.
- 15 C. Fan, Q. Feng, G. Xu, J. Lv, Y. Zhang, J. Liu, Y. Qin and Y. Wu, *Appl. Surf. Sci.*, 2018, **427**, 730-738.
- 16 D. Feng, Y. Cheng, J. He, L. Zheng, D. Shao, W. Wang, W. Wang, F. Lu, H. Dong, H. Liu, R. Zheng and H. Liu, *Carbon*, 2017, **125**, 454-463.
- 17 J. Lu, Y. Wang, J. Huang, L. Cao, J. Li, G. Hai and Z. Bai, *Mater. Sci. Eng. B*, 2016, **214**, 19-25.
- 18 W. Li, F. Hua, T. Zhang, Y. Zhang and Q. Xu, *RSC Adv.*, 2016, **6**, 52067-52075.
- 19 W. Chen, T.-Y. Liu, T. Huang, X.-H. Liu, J.-W. Zhu, G.-R. Duan and X.-J. Yang, *J. Mater. Sci.*, 2015, **50**, 8142-8152.
- 20 Z. Li, J. Wang, K. Zhu, F. Ma and A. Meng, *Mater. Lett.*, 2015, **145**, 167-170.



- 21 W. Li, C. Feng, S. Dai, J. Yue, F. Hua and H. Hou, *Appl. Catal. B*, 2015, **168-169**, 465-471.
- 22 Y. Zhou, L. Zhang, J. Liu, X. Fan, B. Wang, M. Wang, W. Ren, J. Wang, M. Li and J. Shi, *J. Mater. Chem. A*, 2015, **3**, 3862-3867.
- 23 Z. Zhang, J. Huang, M. Zhang, Q. Yuan and B. Dong, *Appl. Catal. B*, 2015, **163**, 298-305.
- 24 S. Zhang, J. Li, X. Wang, Y. Huang, M. Zeng and J. Xu, *ACS Appl. Mater. Interfaces*, 2014, **6**, 22116-22125.
- 25 J. Hong, S. Yin, Y. Pan, J. Han, T. Zhou and R. Xu, *Nanoscale*, 2014, **6**, 14984-14990.
- 26 Y. Bu and Z. Chen, *Electrochim. Acta*, 2014, **144**, 42-49.
- 27 I. Aslam, C. Cao, M. Tanveer, W. S. Khan, M. Tahir, M. Abid, F. Idrees, F. K. Butt, Z. Ali and N. Mahmood, *New J. Chem.*, 2014, **38**, 5462-5469.
- 28 Y. Bu, Z. Chen, C. Feng and W. Li, *RSC Adv.*, 2014, **4**, 38124-38132.
- 29 C. Xing, Z. Wu, D. Jiang and M. Chen, *J. Colloid Interface Sci.*, 2014, **433**, 9-15.
- 30 Y. Yang, W. Guo, Y. Guo, Y. Zhao, X. Yuan and Y. Guo, *J. Hazard. Mater.*, 2014, **271**, 150-159.
- 31 P. He, L. Song, S. Zhang, X. Wu and Q. Wei, *Mater. Res. Bull.*, 2014, **51**, 432-437.
- 32 G. Dong and L. Zhang, *J. Mater. Chem.*, 2012, **22**, 1160-1166.
